# Supplementary material for: Magnetic resonance imaging arterial spin labeling hypoperfusion with diffusion-weighted image hyperintensity is useful for diagnostic imaging of Creutzfeldt–Jakob disease
Source: PubMed Central journal article supplement (PMC10598551; doi:10.3389/fneur.2023.1242615), 2023-10-10
Supplement: Table_2.pdf [file Table_2.pdf]

**Online Resource 2.** Comparison between the mean and standard deviation of the normalized values of ASL-CBF, SPECT, and PET in the DWI-High and DWI-Normal regions in patients with CJD.

| CJD patient # | ASL-CBF values (N = 10)  |             | SPECT values (N = 8)     |             | PET values (N = 3)       |             |
|---------------|--------------------------|-------------|--------------------------|-------------|--------------------------|-------------|
|               | DWI-High                 | DWI-Normal  | DWI-High                 | DWI-Normal  | DWI-High                 | DWI-Normal  |
| CJD 1         | 0.92 ± 0.10 <sup>c</sup> | 1.07 ± 0.14 | 0.89 ± 0.06 <sup>d</sup> | 1.00 ± 0.12 | 0.89 ± 0.08 <sup>d</sup> | 1.00 ± 0.11 |
| CJD 2         | 0.91 ± 0.08 <sup>b</sup> | 1.03 ± 0.10 | 0.85 ± 0.08 <sup>a</sup> | 1.04 ± 0.13 | 0.88 ± 0.13 <sup>c</sup> | 1.03 ± 0.15 |
| CJD 3         | 0.93 ± 0.23 <sup>d</sup> | 1.11 ± 0.20 | 0.90 ± 0.14              | 0.96 ± 0.16 | 0.92 ± 0.11              | 0.99 ± 0.14 |
| CJD 4         | 0.75 ± 0.10 <sup>a</sup> | 1.11 ± 0.14 | 0.76 ± 0.10 <sup>a</sup> | 1.05 ± 0.14 | N/A                      | N/A         |
| CJD 5         | 0.87 ± 0.09 <sup>d</sup> | 1.02 ± 0.16 | 0.84 ± 0.17              | 0.98 ± 0.20 | N/A                      | N/A         |
| CJD 6         | 0.97 ± 0.09              | 1.00 ± 0.11 | 0.86 ± 0.09 <sup>d</sup> | 1.00 ± 0.18 | N/A                      | N/A         |
| CJD 7         | 0.98 ± 0.12              | 1.00 ± 0.09 | 0.92 ± 0.09              | 1.00 ± 0.15 | N/A                      | N/A         |
| CJD 8         | 1.01 ± 0.13              | 1.00 ± 0.16 | 0.99 ± 0.09              | 1.01 ± 0.13 | N/A                      | N/A         |
| CJD 9         | 0.92 ± 0.11 <sup>b</sup> | 1.14 ± 0.21 | N/A                      | N/A         | N/A                      | N/A         |
| CJD 10        | 0.87 ± 0.13 <sup>a</sup> | 1.17 ± 0.23 | N/A                      | N/A         | N/A                      | N/A         |
| CJD mean      | 0.91 ± 0.15 <sup>a</sup> | 1.06 ± 0.17 | 0.88 ± 0.12 <sup>a</sup> | 1.01 ± 0.16 | 0.90 ± 0.11 <sup>a</sup> | 1.00 ± 0.13 |

t-test was used to evaluate the differences in the normalized ASL-CBF values between the DWI-High and DWI-Normal regions. ASL; Arterial spin labeling, CBF; Cerebral blood flow, CJD; Creutzfeldt–Jacob disease, DWI; Diffusion-weighted image, HC; Healthy control, M; Male, N/A; Not available, PET; Positron emission tomography, SPECT; Single-photon emission computed tomography, VOI; Volume of interest. <sup>a</sup> p-value of t-test < 0.001, <sup>b</sup> p-value of t-test < 0.005, <sup>c</sup> p-value of t-test < 0.01, <sup>d</sup> p-value of t-test < 0.05, compared with DWI-normal.
